# Supplementary material for: Turning Tissue Waste into High-Performance Microfiber Filters for Oily Wastewater Treatment
Source: MDPI journal article supplement (doi:10.3390/ma13020378), 2020-01-14
Supplement: s1 [file s1]

*Supplementary Materials*

# Turning Tissue Waste into High-Performance Microfiber Filters for Oily Wastewater Treatment

Gaoliang Wei, Jun Dong, Jing Bai, Yongsheng Zhao \* and Chuanyu Qin

Key Laboratory of Groundwater Resources and Environment (Ministry of Education, China), College of New Energy and Environment, Jilin University, Changchun 130021, China; glwei@jlu.edu.cn (G.W.); dongjun@jlu.edu.cn (J.D.); baijing927@jlu.edu.cn (J.B.); qincyu@jlu.edu.cn (C.Q.)

\* Correspondence: zhaoyongsheng@jlu.edu.cn; Tel.: +86-413-8502608

Received: 4 November 2019; Accepted: 31 December 2019; Published: date

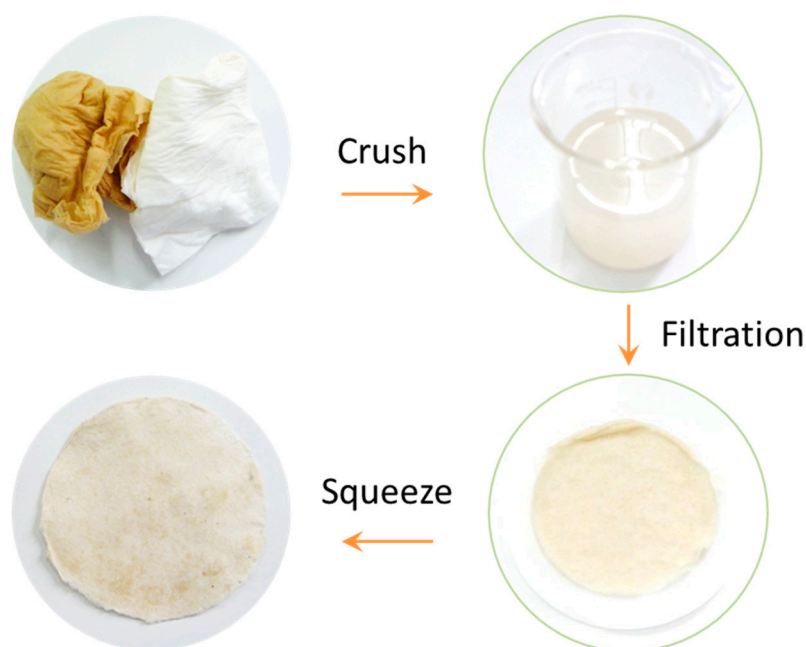

**Figure S1.** Preparation process of microfiber filters derived from tissue waste.

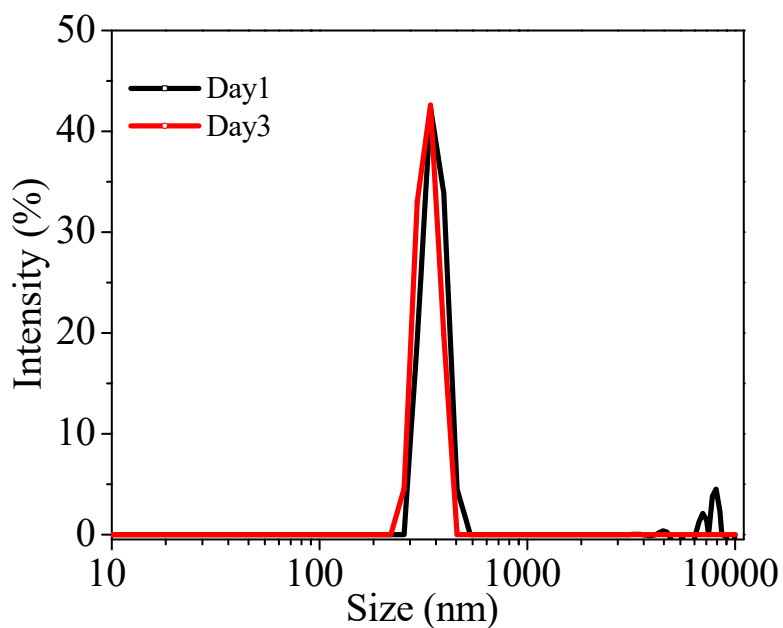

**Figure S2.** Diameter distribution of oil droplets in as-prepared emulsion and the one after standing for 3 days. The diameter distribution of oil droplets do not change with the increase of time within 3 day, which suggests the emulsion can be stable for at least 3 day.

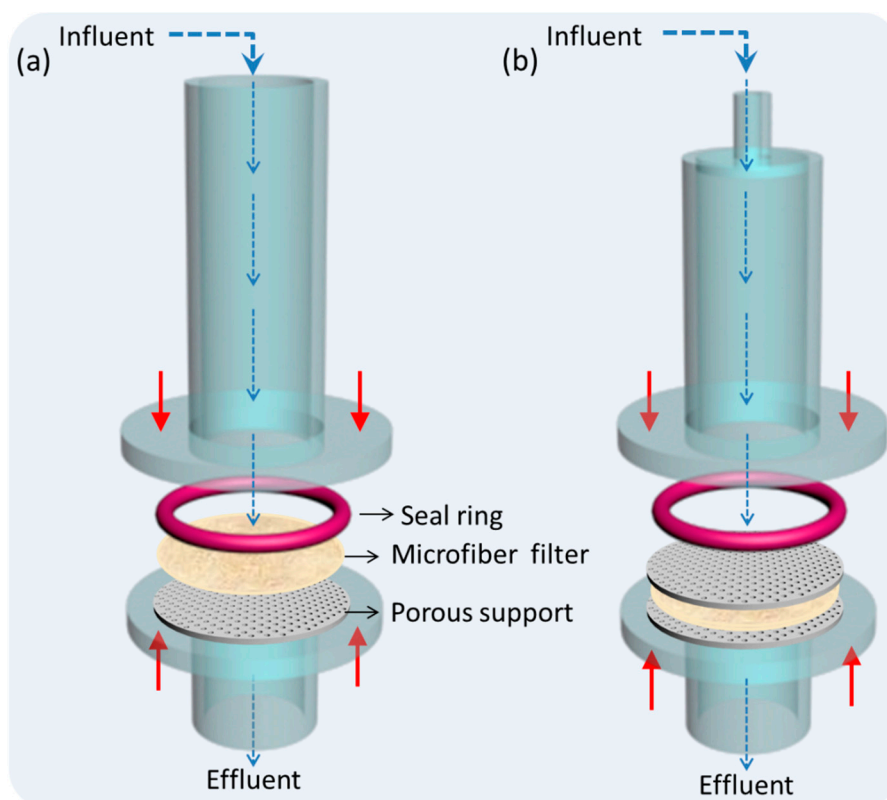

**Figure S3.** Schematic illustration of the setups for filtration of free oil/water mixtures (a) and emulsions (b).

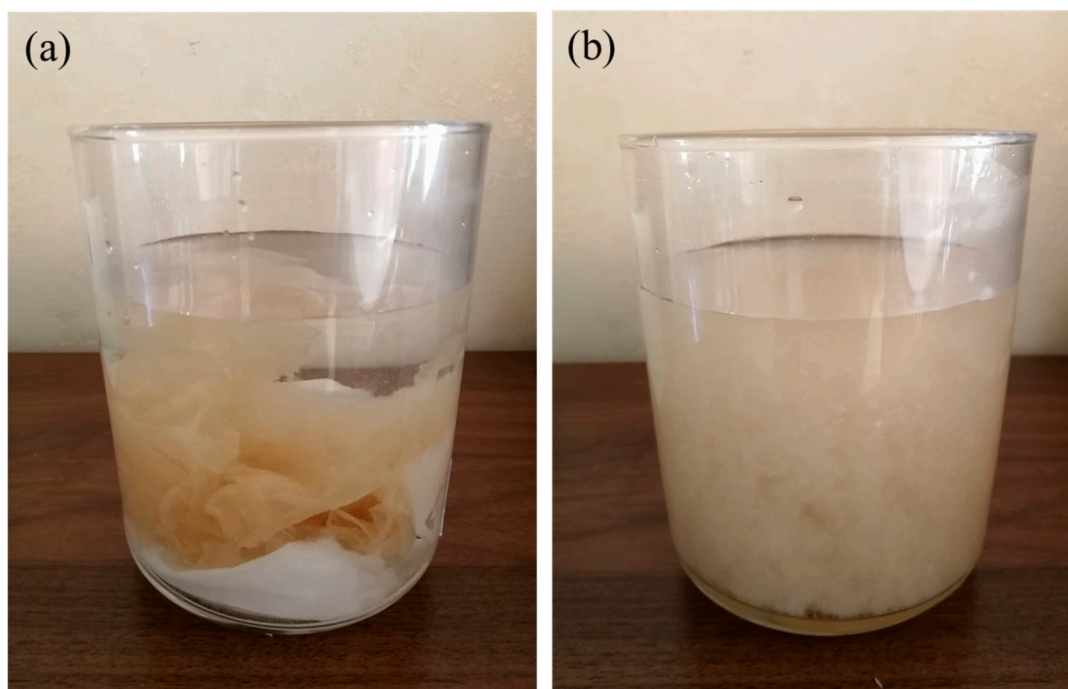

**Figure S4.** (a) Tissue before crush in water. (b) Obtained turbid pulp.

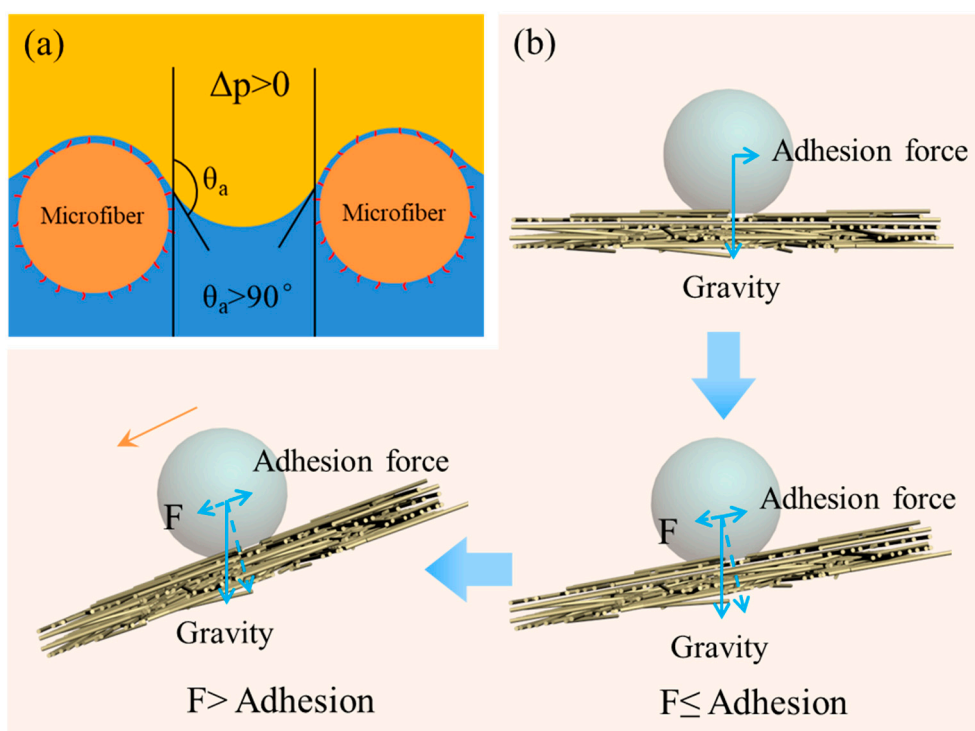

**Figure S5.** (a) Schematic illustration of wetting modes of the oil/water/microfiber system. (b) Schematic illustration of the change of force exerted on an oil droplet with the increase of inclination angle.

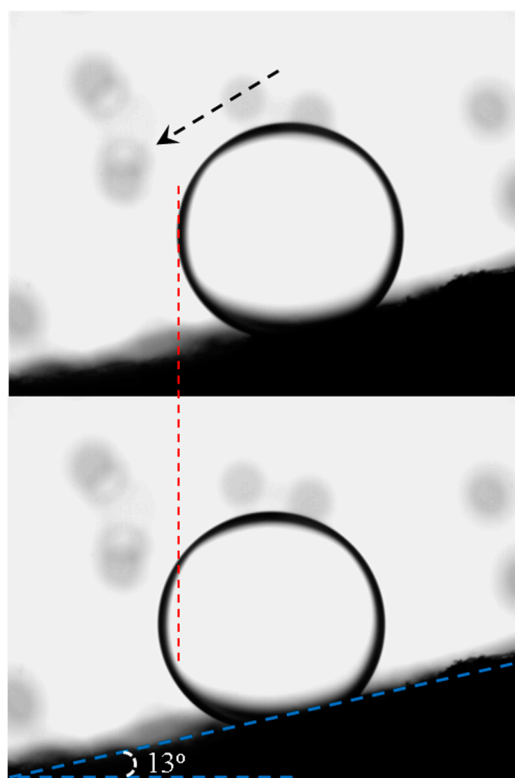

**Figure S6.** Rolling angle measurement of 1,2-dichloroethane on filter surface.

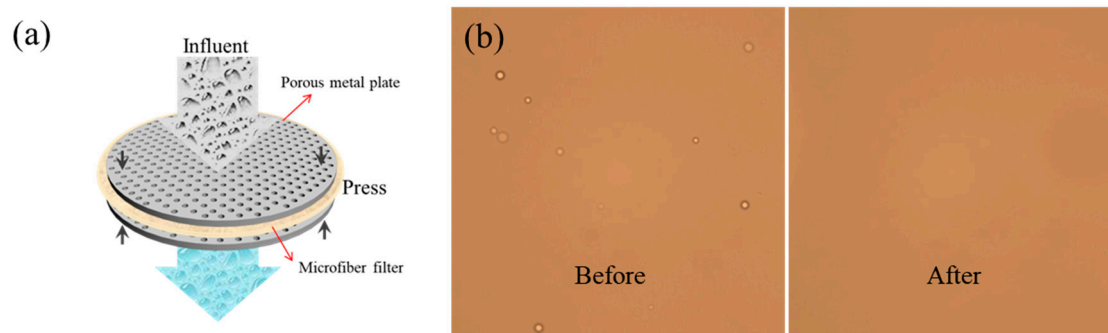

**Figure S7.** (a) Illustration of the sandwich-like structure of the microfiber filter and two porous metal plates. (b) Optical microscope images of emulsion before and after filtration.

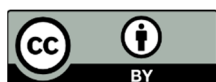

© 2019 by the authors. Submitted for possible open access publication under the terms and conditions of the Creative Commons Attribution (CC BY) license (<http://creativecommons.org/licenses/by/4.0/>).
